# Supplementary material
Source: PubMed Central journal article supplement (PMC4400542)
Supplement: supp_eru308_jexbot118794_file001.pdf [file supp_eru308_jexbot118794_file001.pdf]

gcctcagctttaccagctttggtcaaagaataactcaagttcttcaaacctcatcactcggctctctctatccataactggtggt  
 tttttgtttctccttgttgaacgaatctgacatttggaaatgtcgatacagaatctcgacatcctgatctccgtgcggaacaa  
 tctccagggtttgttcaggagagaatgcataaccacatcaaacagaccatgtaagtcgcggaagcatattcttctgaaagtt  
 -1700 tagtatacaataagagaaggcacatttcatattctctctaacagaaatgtggatttatgcagcatgagcgcagtgacacaagctcc  
 caaaaatcttgatagtcocgcagaaatactccggacagttcgtactgggaaaggtgcttcagtagaaagcatgatggctggatctc  
 gagcaagccctgaaactattaaccgccaggctgctgatattaatgtcacgccattctattctggttaaagcttctctattttat  
 ccagctcttcagatcactagcttggattgtggaatatttagcgttaagttatttgattttcatgggaattacaggagatgatgtgag  
 atccatgcctagtagacaccatccgcacgtggagcagcttcaattaacaacatagagatcagctctaaaagggttaagaacacatcta  
 -1275 agtttctctgatactaaaaccaatagtaacttacaacaagtttccattggaagcagatcactaaatcttctctctgcttaccaa  
 atcagtcgcatgcccaatagaaaaagaccaaattctcaccagaagaggactcgaaccagtgggcgaagagagaccgtgggagc  
 accgtgaaatagagtttgagttttcaatgtttacctgaaaaacgcttcacagccgataaaggtagaagtttttaattgtcttttga  
 tctatacaactttcaaaaacaccatcttacaaccttaacgtgcttctttttcacagaaatactatttgaactgcatctaca  
 cagactcaaaagccagtggtgcaatcaatcagacgagatgataacagatagcatcaaaaggtaagagattcaaaattatctgcaa  
 -850 atctataactgagtaacaatgatgagatctataaacgaaacacagtcacctgaagacacactttgaaacacctggagctcctca  
 agtggaatctcttaacaagctcgctgttggaaatggacagaaacgctgcagctaaactcttctccaatcctgtggtactaacttc  
 tacttcaacttaattcactttctttgagcataaaaaacctgactatgattattgtttatatgtccagtggttagctactcggg  
 agtcatcaaggtaaaccaagcagagccttatggggacattctcattgcaagaggaccaacatgtaaggtttgattcttaatta  
 taaaagattctggtgaaccgattatccatagttgttttgcctttcattctagcagagagagttcgttagacttttttaagttat  
 -425 aaagagcaagcgttctttaccaaaatctctctgttggctctttgttataatggttattagtacctcacaatcacaacatccta  
 gctttgtccgaaaaactctgaaactaattttacattattctataaatttaagtttttactcgcataatgtgagctctcttagaa  
 gatgtattgaacagagcataaaacaaaacaatagtttaataataactccgttgacaaaagaaaatggtggcagtcacgtaataagcc  
 gcaactgccccatttcatacaatacatgtaatactctcataaattagtcgctcacacgtttcatacaatttgcataatttctcaa  
 aaaattaaactaattacacaatcaaataccagcctctatatgtttctataataacgcatatttcttaccctggaatcacacatca  
 -43 agaagaagaagaagtttaagaagcagagtgataacaagtaac

At5g05500 - AtPRPL1

- |                                                                                                                                            |                                                                                                                                   |
|--------------------------------------------------------------------------------------------------------------------------------------------|-----------------------------------------------------------------------------------------------------------------------------------|
|  ABRE-like sequence                                     |  Pollen-specific element                       |
|  Cytokinin-responsive element                           |  ABA-responsive element                        |
|  Gibberellin-responsive element ( <i>Oryza sativa</i> ) |  Right part of root hair specific cis-elements |

Fig. S1

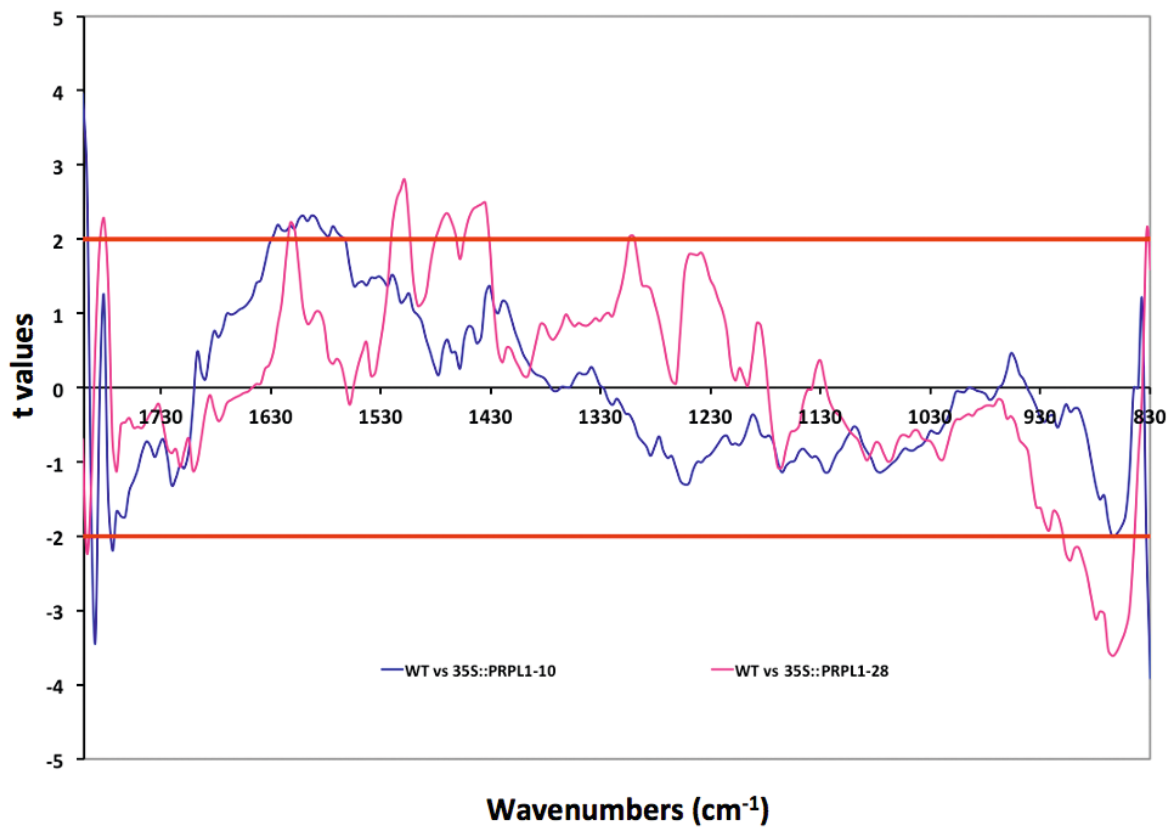

Fig. S2
